# Supplementary material
Source: publisher figshare collection journal article supplement (https://acs.figshare.com/ndownloader/files/3973282)
Supplement: Supplementary file 1 [file 3973282]

## **Supporting Information**

### **A Solution-Chemical Route to Generalized Synthesis of Metal Germanate Nanowires with Room-Temperature, Light-Driven Hydrogenation Activity of CO<sub>2</sub> into Renewable Hydrocarbon Fuels**

Qi Liu, Yong Zhou, \* Wenguang Tu, Shicheng Yan, Zhigang Zou\*

*Key Laboratory of Modern Acoustics, MOE, Institute of Acoustics, Nanjing University, Nanjing 210093, P. R. China. Ecomaterials and Renewable Energy Research Center (ERERC), School of Physics, Department of Materials Science and Engineering, Nanjing University, National Laboratory of Solid State Microstructures, Nanjing 210093, P. R. China*

*School of Mechanical and Automotive Engineering, Anhui Polytechnic University, Wuhu 241000, P. R. China*

Email: zhouyong1999@nju.edu.cn; zgrou@nju.edu.cn

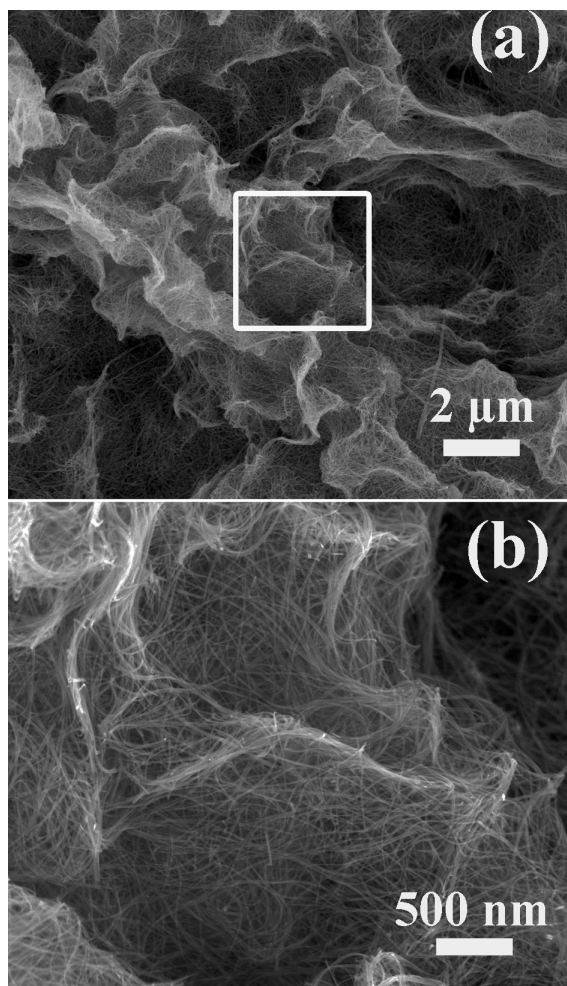

**Figure S1.** SEM images of the Cd<sub>2</sub>Ge<sub>2</sub>O<sub>6</sub> nanowire at different magnifications. (b)

Magnification of the selected area marked with a square as shown in (a).

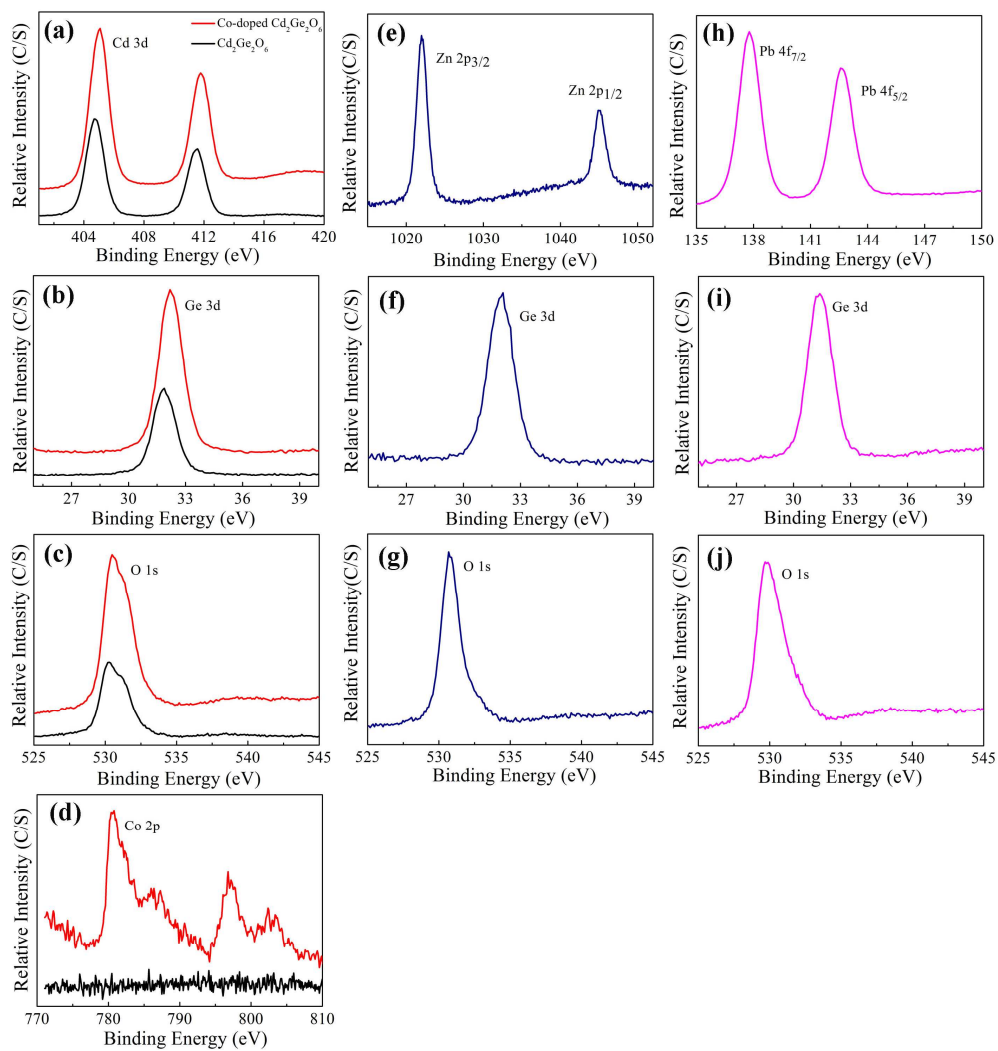

**Figure S2.** XPS spectra of (a-d)  $\text{Cd}_2\text{Ge}_2\text{O}_6$  and Co-doped  $\text{Cd}_2\text{Ge}_2\text{O}_6$  nanowires, (e-g)  $\text{Zn}_2\text{GeO}_4$  nanowire, and (h-j)  $\text{PbGeO}_3$  nanowire.

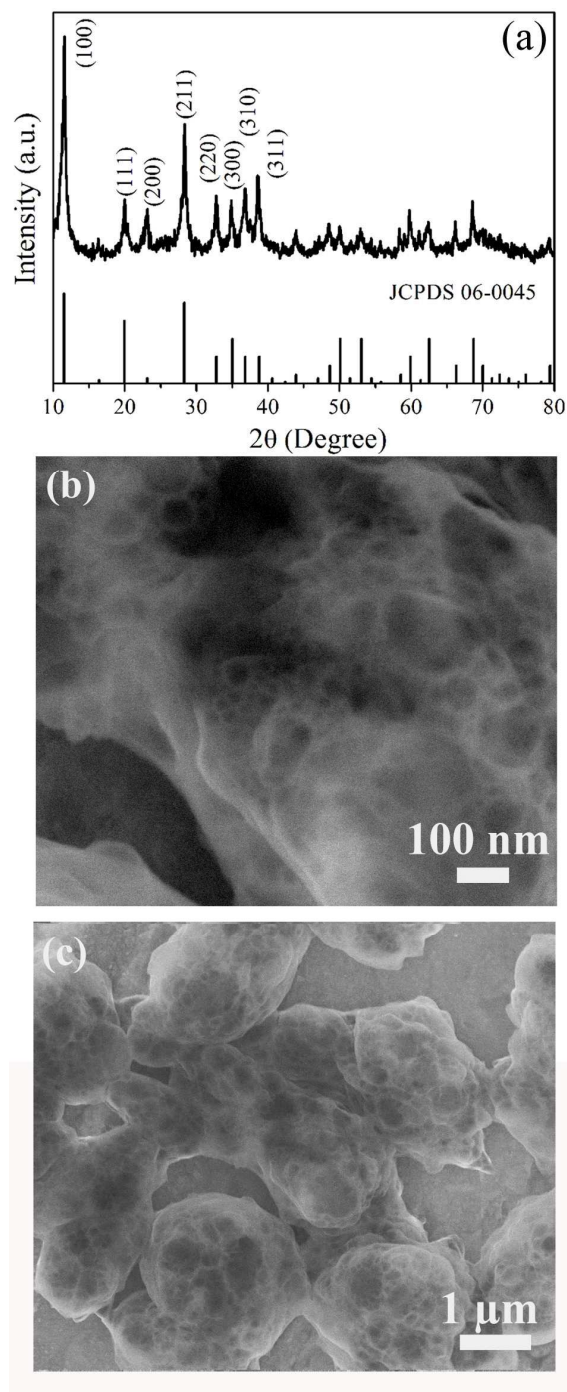

**Figure S3.** (a) XRD pattern, (b, c) corresponding FE-SEM image of the  $\text{NH}_4\text{H}_3\text{Ge}_2\text{O}_6$  produced employing  $\text{GeO}_2$  as a single reactant formed with volume ratio of  $\text{N}_2\text{H}_4\cdot\text{H}_2\text{O} : \text{H}_2\text{O}$  of 1:2 for 12 h.

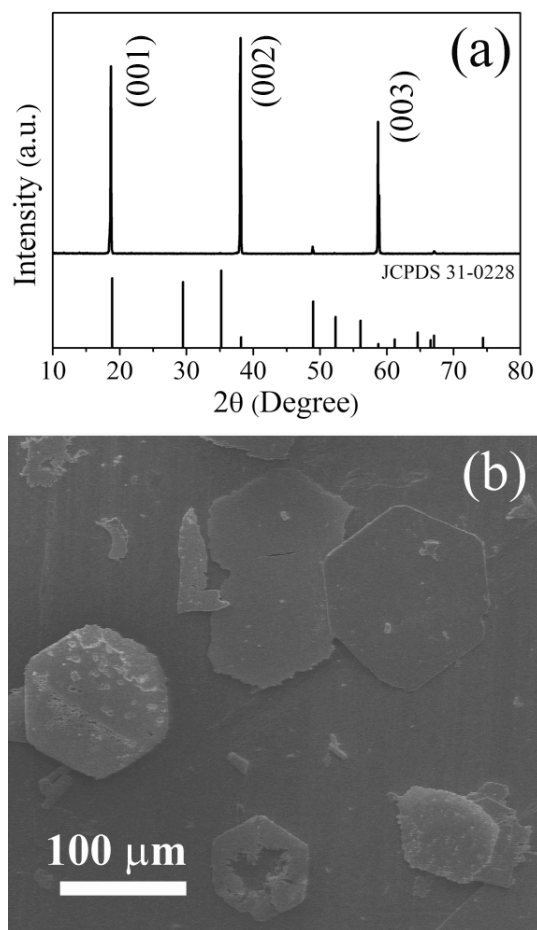

**Figure S4.** (a) XRD pattern and (b) FE-SEM image of the  $\text{Cd}(\text{OH})_2$  hexagonal nanoplate formed with  $\text{Cd}(\text{OAc})_2$  as single reactant with volume ratio of  $\text{N}_2\text{H}_4\cdot\text{H}_2\text{O} : \text{H}_2\text{O}$  of 1:2.

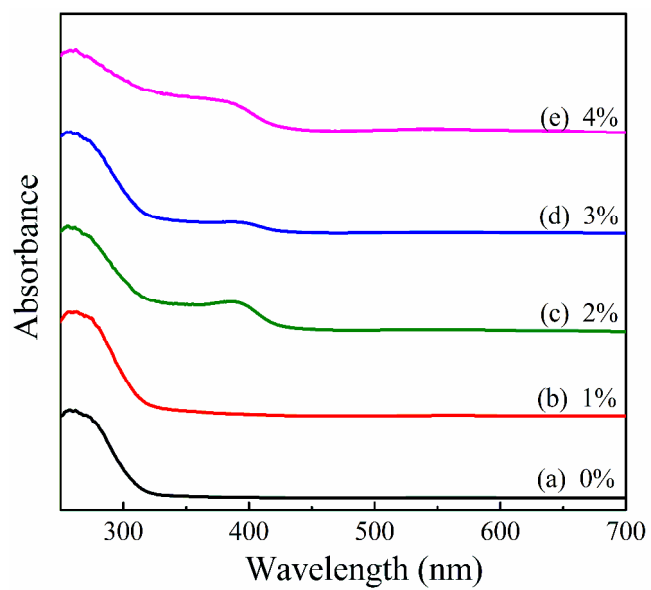

**Figure S5.** UV-vis absorption spectra of the  $\text{Cd}_2\text{Ge}_2\text{O}_6$  and Co-doped  $\text{Cd}_2\text{Ge}_2\text{O}_6$  nanowires with different cobalt percentages in the reaction precursors.

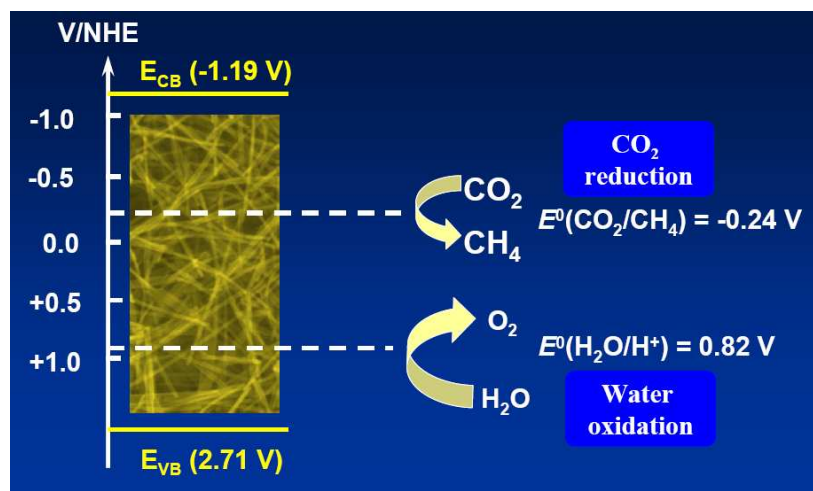

**Figure S6.** Relationship between the band structure of the  $\text{Cd}_2\text{Ge}_2\text{O}_6$  nanowire and the redox potentials of  $\text{CO}_2$  photoreduction

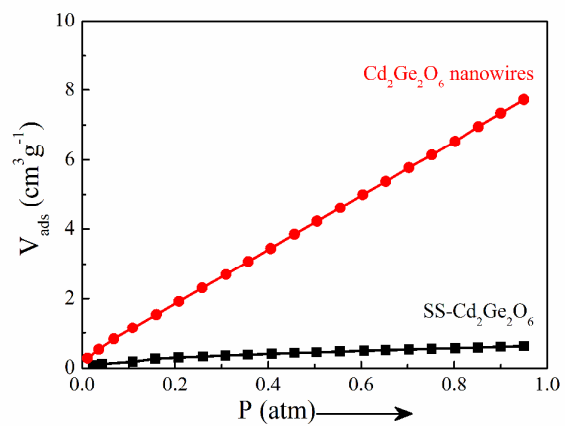

**Figure S7.**  $\text{CO}_2$  adsorption isotherms (273 K) of the  $\text{Cd}_2\text{Ge}_2\text{O}_6$  nanowire and SS- $\text{Cd}_2\text{Ge}_2\text{O}_6$ .
